# Supplementary material for: Establishment of pten knockout medaka with transcription activator–like effector nucleases (TALENs) as a model of PTEN deficiency disease
Source: PLOS journal article supplement (doi:10.1371/journal.pone.0186878), 2017-10-20
Supplement: S3 (10.1371/journal.pone.0186878.s003) [file journal.pone.0186878.s003]

48 hpf

56 hpf

72 hpf

6 dpf

Tip of the tail at 6 dpf

Wild-  
type

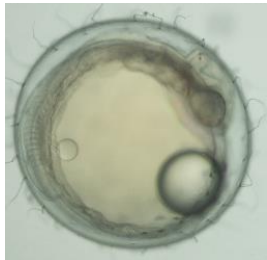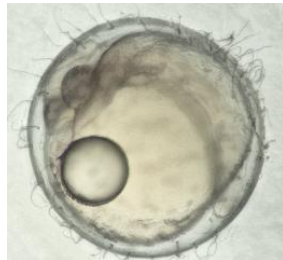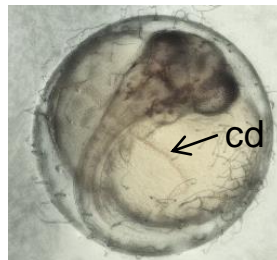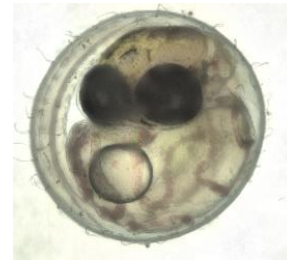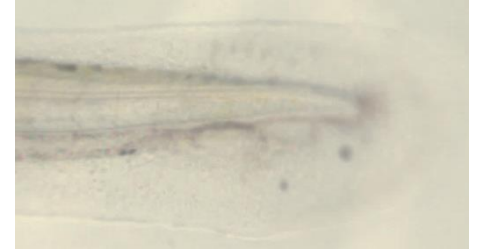

dko1

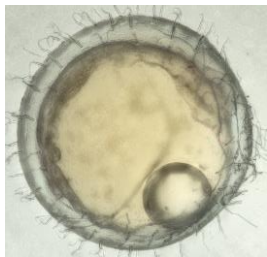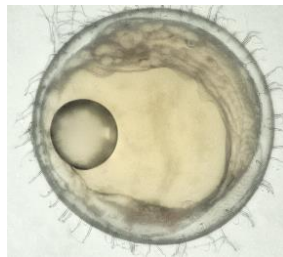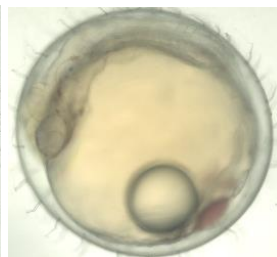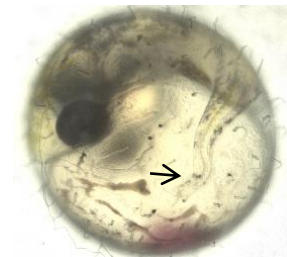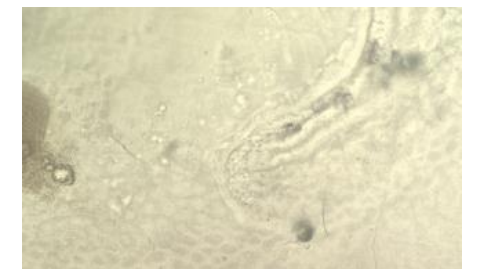

dko2

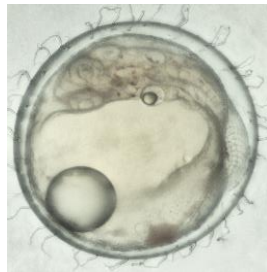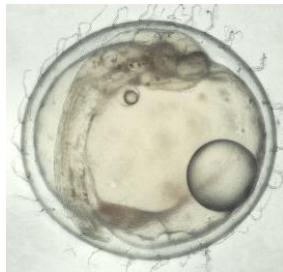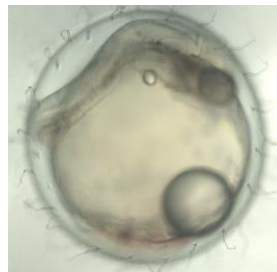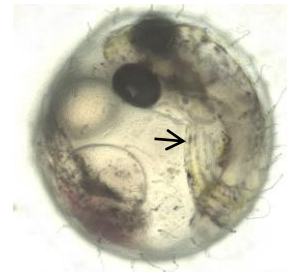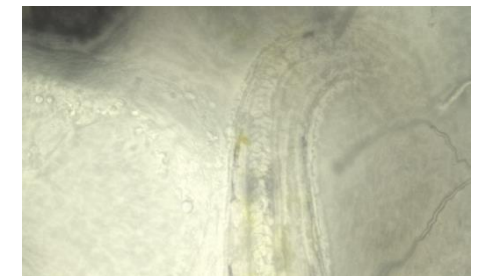

1 mm
